# Supplementary material
Source: ML conference proceedings conference paper supplement (https://openaccess.thecvf.com/content/CVPR2021/html/Zanfir_Neural_Descent_for_CVPR_2021_paper.html)
Supplement: Supplementary file 1 [file Zanfir_Neural_Descent_for_CVPR_2021_supplemental.zip]

Archive with 2 entries (2 files):
- 08601-supp.pdf
- Image_reconstructions.mp4
